# Supplementary material for: Plasmon-induced catalytic CO2 hydrogenation by a nano-sheet Pt/HxMoO3−y hybrid with abundant surface oxygen vacancies
Source: Royal Society of Chemistry journal article supplement (doi:10.1039/d1ta02277f), 2021-01-01
Supplement: d1ta02277f1.pdf [file d1ta02277f1.pdf]

## Supporting information

# Plasmon-induced Catalytic CO<sub>2</sub> Hydrogenation by a Nano-sheet Pt/H<sub>x</sub>MoO<sub>3-y</sub> Hybrid with Abundant Surface Oxygen Vacancies

Hao Ge,<sup>a</sup> Yasutaka Kuwahara,<sup>\*a,b,c,d</sup> Kazuki Kusu,<sup>a</sup> Hiromi Yamashita<sup>\*a,b,c</sup>

<sup>a</sup> Division of Materials and Manufacturing Science, Graduate School of Engineering, Osaka University, 2-1 Yamada-oka, Osaka 565-0871, Japan

<sup>b</sup> Institute for Open and Transdisciplinary Research Initiatives (OTRI), Osaka University, 2-1 Yamada-oka, Suita, Osaka 565-0871, Japan

<sup>c</sup> Unit of Elements Strategy Initiative for Catalysts & Batteries (ESICB), Kyoto University, Katsura, Kyoto 615-8520, Japan

<sup>d</sup> JST, PRESTO, 4-1-8 Hon-Cho, Kawaguchi, Saitama 332-0012, Japan

## Content

**Figure S1.** (a) XRD patterns and (b) FE-SEM images of MoO<sub>3</sub> with different morphologies (Bulk, Belt, Rod, Sheet).

**Figure S2.** N<sub>2</sub> adsorption-desorption isotherms of (a) MoO<sub>3</sub> (Bulk, Belt, Rod, Sheet) and (b) Pt/H<sub>x</sub>MoO<sub>3-y</sub> (Bulk, Belt, Rod, Sheet).

**Figure S3.** H<sub>2</sub> Temperature programmed reduction (H<sub>2</sub>-TPR) profiles of Pt/MoO<sub>3</sub> (Bulk, Belt, Rod, Sheet) and pure MoO<sub>3</sub> (Sheet).

**Figure S4.** H<sub>2</sub> Temperature programmed reduction (H<sub>2</sub>-TPR) profiles of Ru/MoO<sub>3</sub>(Sheet), Pt/MoO<sub>3</sub>(Sheet), Pd/MoO<sub>3</sub>(Sheet) and Au/MoO<sub>3</sub>(Sheet).

**Table S1.** Performance comparison of different photocatalysts for CO<sub>2</sub> hydrogenation.

**Figure S5.** TEM images of Pt/H<sub>x</sub>MoO<sub>3-y</sub>(Sheet) before and after reaction.

**Figure S6.** XRD patterns of Pt/H<sub>x</sub>MoO<sub>3-y</sub>(Sheet) before and after reaction.

**Figure S7.** (a) The stability test and (b) gas-switching test of Pt/H<sub>x</sub>MoO<sub>3-y</sub>(Sheet) for photothermal catalytic CO<sub>2</sub> reduction in a flowing system using a fixed-bed reactor system. (Reaction conditions: catalyst (0.1 g), H<sub>2</sub>/CO<sub>2</sub> (10/10 mL/min), Xe lamp ( $\lambda > 450$  nm), Temp. = 140 °C).

**Figure S8.** The activity performance of Pt/H<sub>x</sub>MoO<sub>3-y</sub>(Sheet) for photothermal catalytic CO<sub>2</sub> reduction under different light irradiation.

**Figure S9.** Effect of metal on the catalytic efficiency: Pt/H<sub>x</sub>MoO<sub>3-y</sub>(Sheet), Ru/H<sub>x</sub>MoO<sub>3-y</sub>(Sheet), Pd/H<sub>x</sub>MoO<sub>3-y</sub>(Sheet), and Au/H<sub>x</sub>MoO<sub>3-y</sub>(Sheet). (All of the catalysts were reduced by H<sub>2</sub> at 200 °C; Reaction conditions: catalyst (0.1 g), H<sub>2</sub>: CO<sub>2</sub> (0.5 atm:0.5 atm), light source:  $\lambda > 450$  nm, Reaction Temperature: 140 °C))

**Figure S10.** Pt 4f XPS spectra of Pt/H<sub>x</sub>MoO<sub>3-y</sub>(Sheet), Pt/H<sub>x</sub>MoO<sub>3-y</sub>(Bulk), Pt/MoO<sub>3</sub>(Sheet) and Pt/MoO<sub>3</sub>(Bulk).

**Table S2.** Summary of the results of XPS measurement for the Pt/MoO<sub>3</sub>(Bulk), Pt/MoO<sub>3</sub>(Sheet), Pt/H<sub>x</sub>MoO<sub>3-y</sub>(Bulk) and Pt/H<sub>x</sub>MoO<sub>3-y</sub>(Sheet).

**Figure S11.** In-situ Mo K-edge X-ray absorption near-edge structure (XANES) spectra of (a) Pt/MoO<sub>3</sub> with different morphologies before reduction and (b) after reduction.

**Figure S12.** Radial distribution functions (RDFs) of (a) Pt/H<sub>x</sub>MoO<sub>3-y</sub> with different morphologies before reduction and (b) after reduction.

**Figure S13.** Weight changes of the Pt/H<sub>x</sub>MoO<sub>3-y</sub> with different morphologies (a) Bulk, (b) Sheet, (c) Belt and (d) Rod in a flow of either air or N<sub>2</sub> measured by TG analysis.

**Table S3.** The concentration of intercalated H<sup>+</sup> and O vacancy in the samples.

**Table S4.** The amount of oxygen vacancy on the surface in Pt/H<sub>x</sub>MoO<sub>3-y</sub> (Bulk, Belt, Rod, Sheet) after H<sub>2</sub> reduction.

**Table S5.** Summary of the results of XPS measurement for the Pt/H<sub>x</sub>MoO<sub>3-y</sub>(Sheet), Pt/H<sub>x</sub>MoO<sub>3-y</sub>(Sheet)→CO<sub>2</sub> and Pt/H<sub>x</sub>MoO<sub>3-y</sub>(Sheet)→CO<sub>2</sub>→H<sub>2</sub>.

**Figure S14.** XPS spectra of Pt/H<sub>x</sub>MoO<sub>3-y</sub>(Sheet)→CO<sub>2</sub>+H<sub>2</sub> and Pt/H<sub>x</sub>MoO<sub>3-y</sub>(Sheet)→CO<sub>2</sub>: (a) Mo 3*d* XPS spectra, (b) O 1*s* XPS spectra.

**Table S6.** Summary of the results of XPS measurement for the Pt/H<sub>x</sub>MoO<sub>3-y</sub>(Sheet), Pt/H<sub>x</sub>MoO<sub>3-y</sub>(Sheet)→CO<sub>2</sub> and Pt/H<sub>x</sub>MoO<sub>3-y</sub>(Sheet)→CO<sub>2</sub>+H<sub>2</sub>.

**Figure S15.** UV-vis-NIR diffuse reflectance spectra of MoO<sub>3</sub> with different morphologies.

**Figure S16.** (a) CV test of Pt/H<sub>x</sub>MoO<sub>3-y</sub>(Sheet) with two circles and (b) Photocurrent density of Pt/H<sub>x</sub>MoO<sub>3-y</sub>(Sheet) and Pt/H<sub>x</sub>MoO<sub>3-y</sub>(Sheet)-After CV.

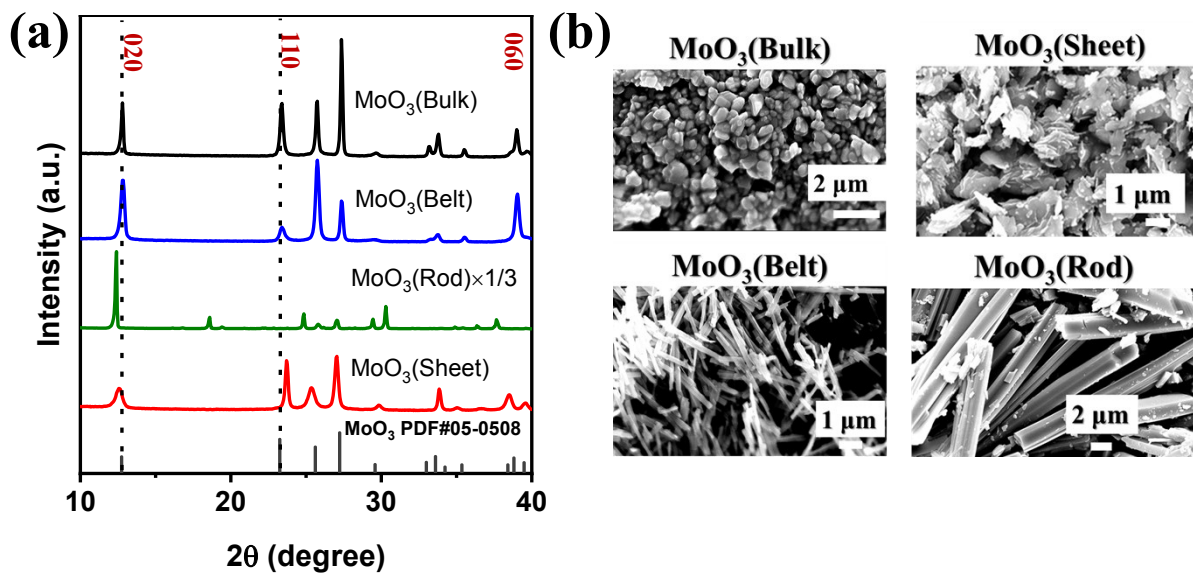

**Figure S1.** (a) XRD patterns and (b) FE-SEM images of MoO<sub>3</sub> with different morphologies (Bulk, Belt, Rod, Sheet).

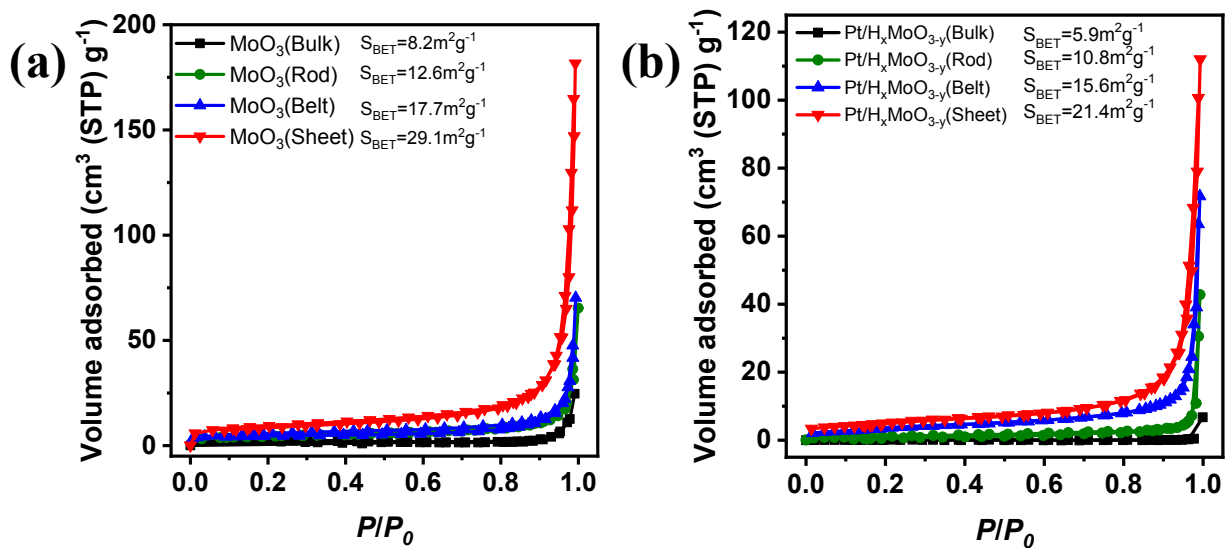

**Figure S2.** N<sub>2</sub> adsorption-desorption isotherms of (a) MoO<sub>3</sub> (Bulk, Belt, Rod, Sheet) and (b) Pt/H<sub>x</sub>MoO<sub>3-y</sub> (Bulk, Belt, Rod, Sheet).

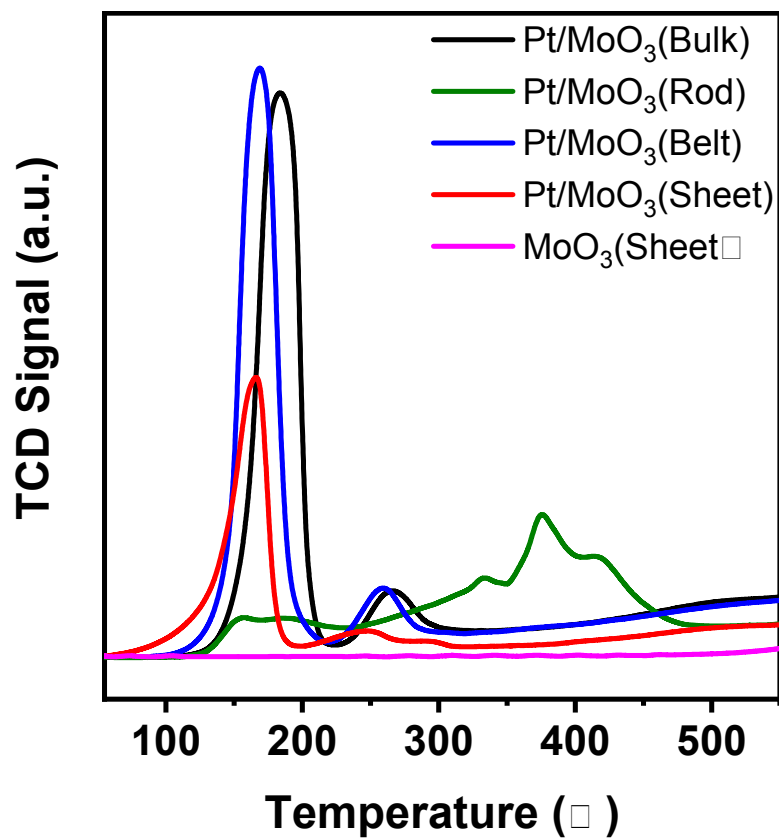

**Figure S3.** H<sub>2</sub> Temperature programmed reduction (H<sub>2</sub>-TPR) profiles of Pt/MoO<sub>3</sub> (Bulk, Belt, Rod, Sheet) and pure MoO<sub>3</sub> (Sheet).

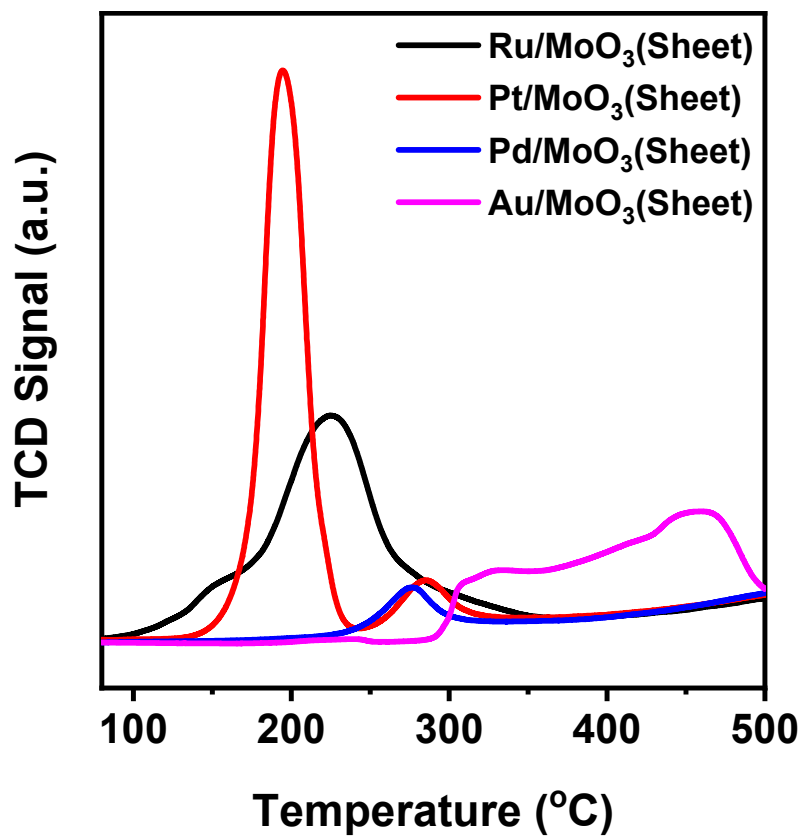

**Figure S4.** H<sub>2</sub> Temperature programmed reduction (H<sub>2</sub>-TPR) profiles of Ru/MoO<sub>3</sub> (Sheet), Pt/MoO<sub>3</sub> (Sheet), Pd/MoO<sub>3</sub> (Sheet) and Au/MoO<sub>3</sub> (Sheet).

**Table S1.** Performance comparison of different photocatalysts for CO<sub>2</sub> hydrogenation

| Catalyst                                           | Gas<br>(CO <sub>2</sub> +H <sub>2</sub> ) | Light Source                    | T (°C) | Activity                                    | Ref          |
|----------------------------------------------------|-------------------------------------------|---------------------------------|--------|---------------------------------------------|--------------|
| Pd@WO <sub>3</sub>                                 | 1:1                                       | 300W Xe<br>lamp                 | 250    | 3 mmol g <sup>-1</sup> h <sup>-1</sup>      | 1            |
| Rh/Al <sub>2</sub> O <sub>3</sub>                  | 1:1                                       | 300W Xe<br>lamp                 | 360    | 96.5%                                       | 2            |
| In <sub>2</sub> O <sub>3-x</sub> (OH) <sub>y</sub> | 1:1                                       | 1000W metal<br>halide bulb      | 150    | 1.2 μmol g <sup>-1</sup> h <sup>-1</sup>    | 3            |
| Pt/NaTaO <sub>3</sub>                              | 1:1                                       | 300W UV-<br>enhanced Xe<br>lamp | -      | 139.1 μmol g <sup>-1</sup> h <sup>-1</sup>  | 4            |
| Pd@Nb <sub>2</sub> O <sub>5</sub>                  | 1:1                                       | 300W Xe<br>lamp                 | -      | 1.8 mmol g <sup>-1</sup> h <sup>-1</sup>    | 5            |
| In <sub>2</sub> O <sub>3-x</sub> nanosheet         | 1:1                                       | 300W Xe<br>lamp                 | 340    | 103.21 mmol g <sup>-1</sup> h <sup>-1</sup> | 6            |
| C-In <sub>2</sub> O <sub>3</sub>                   | 1:1                                       | 300W Xe<br>lamp                 | 340    | 123.41 mmol g <sup>-1</sup> h <sup>-1</sup> | 7            |
| ncSi:H                                             | 1:1                                       | 300W Xe<br>lamp                 | 150    | 250 μmol g <sup>-1</sup> h <sup>-1</sup>    | 8            |
| Fe@C hybrid                                        | 1:1                                       | 300W Xe<br>lamp                 | -      | 26.1 mmol g <sup>-1</sup> h <sup>-1</sup>   | 9            |
| Pt/H <sub>x</sub> MoO <sub>3-y</sub> (Sheet)       | 1:1                                       | 500W Hg-Xe<br>short arc<br>lamp | 140    | 1.2 mmol g <sup>-1</sup> h <sup>-1</sup>    | This<br>work |



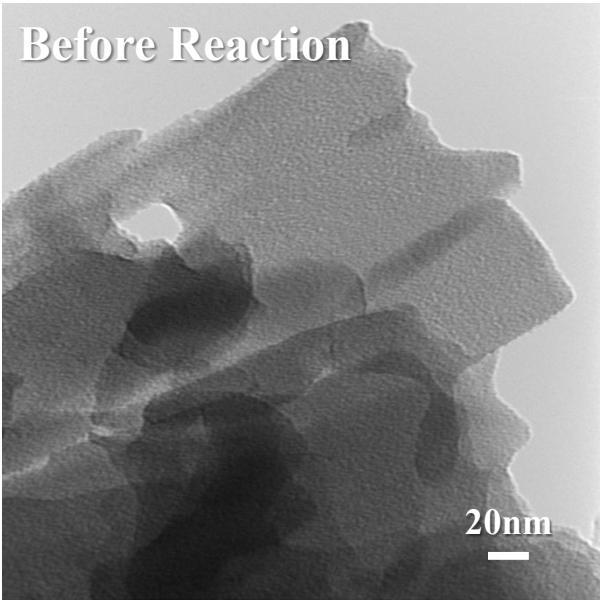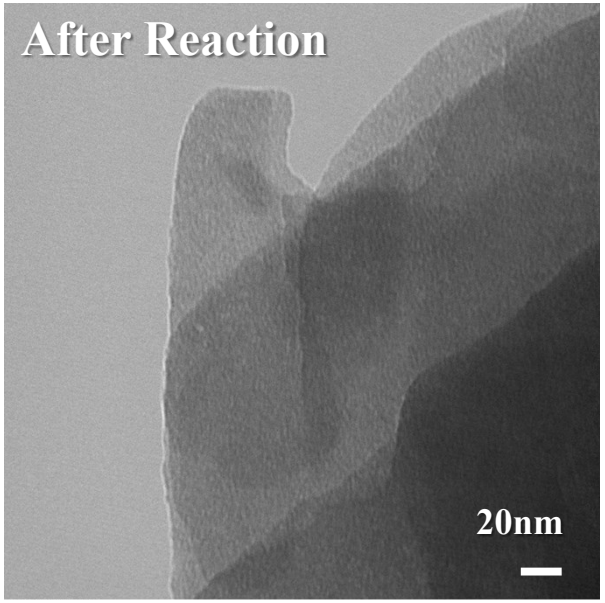

**Figure S5.** TEM images of Pt/H<sub>x</sub>MoO<sub>3-y</sub>(Sheet) before and after reaction.

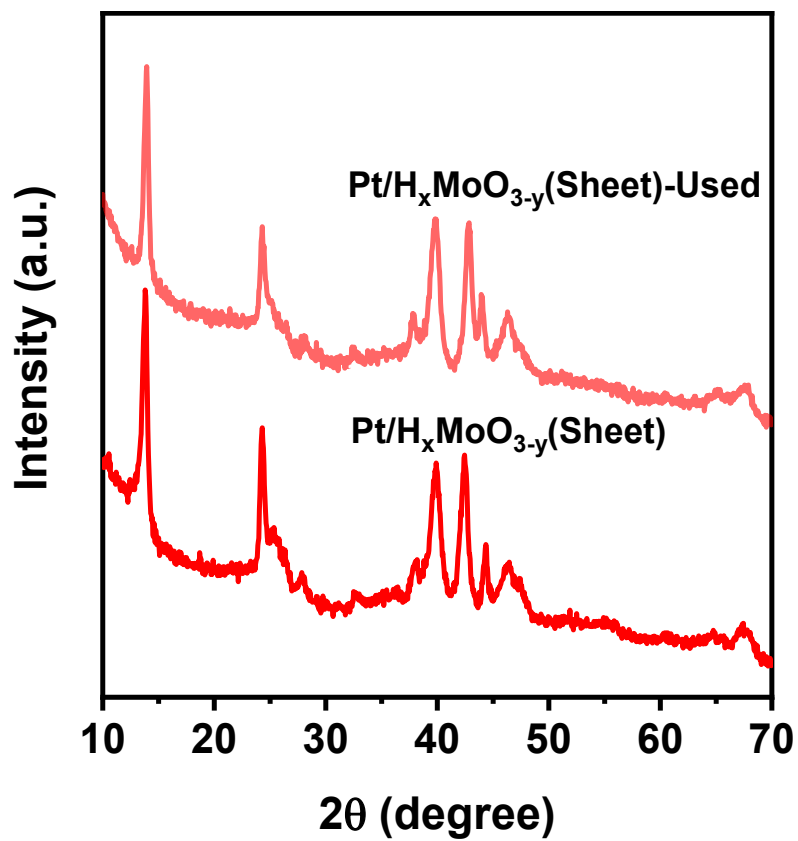

**Figure S6.** XRD patterns of Pt/H<sub>x</sub>MoO<sub>3-y</sub>(Sheet) before and after reaction.

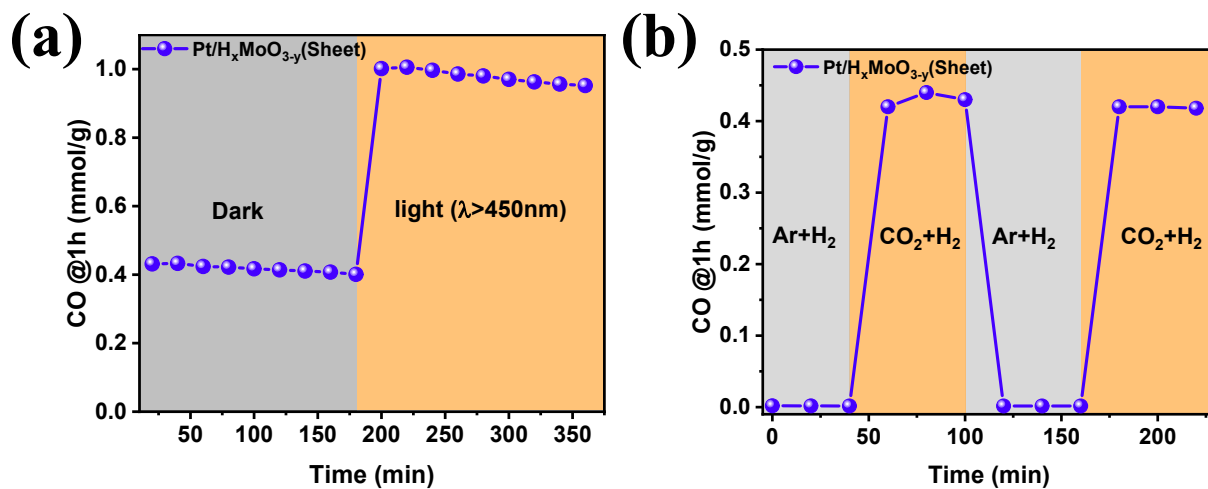

**Figure S7.** (a) The stability test and (b) gas-switching test of Pt/H<sub>x</sub>MoO<sub>3-y</sub>(Sheet) for photothermal catalytic CO<sub>2</sub> reduction in a flowing system using a fixed-bed reactor system. (Reaction conditions: catalyst (0.1 g), H<sub>2</sub>/CO<sub>2</sub> (10/10 mL/min), Xe lamp ( $\lambda > 450\text{ nm}$ ), Temp. = 140 °C)

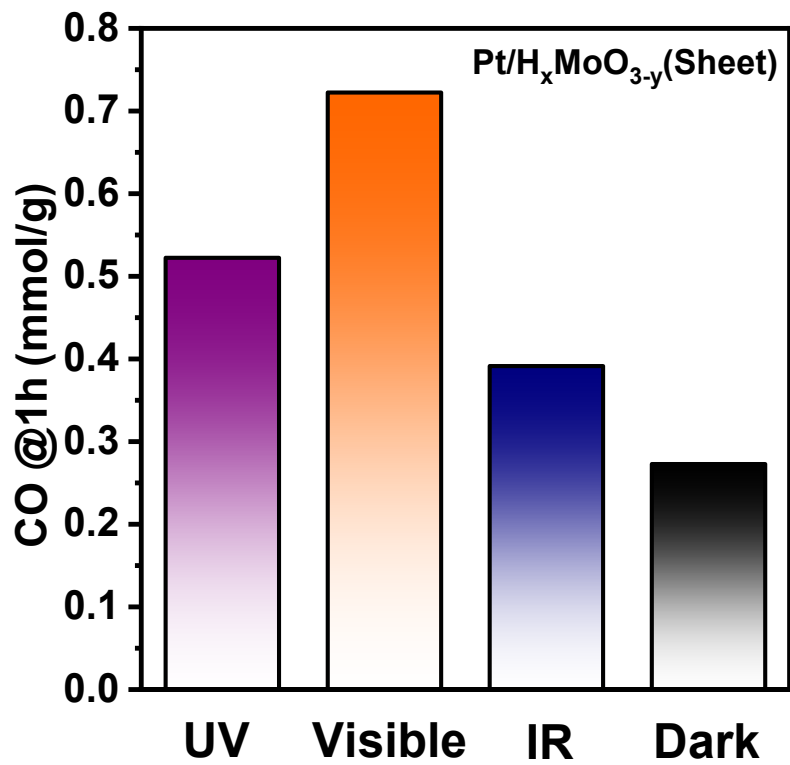

**Figure S8.** The activity performance of Pt/H<sub>x</sub>MoO<sub>3-y</sub>(Sheet) for photothermal catalytic CO<sub>2</sub> reduction under different light irradiation.

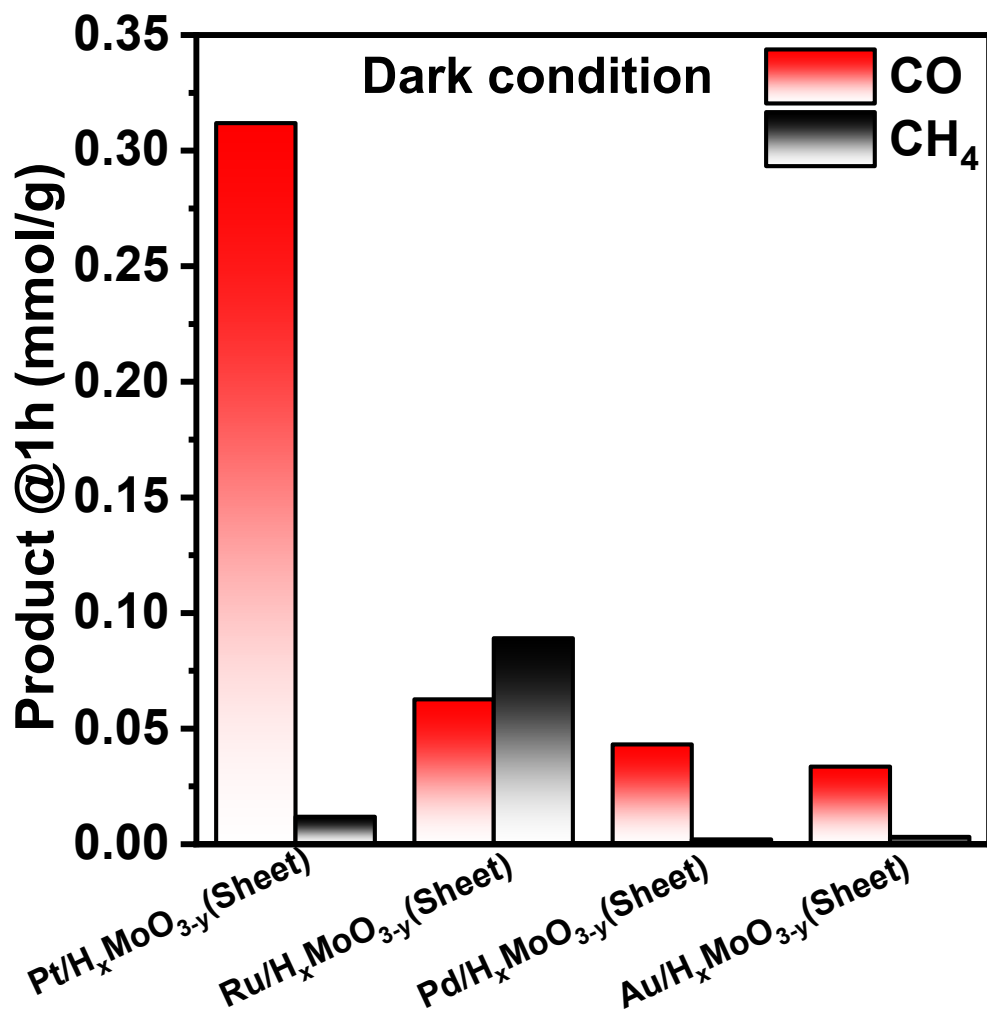

**Figure S9.** Effect of metal on the catalytic efficiency: Pt/H<sub>x</sub>MoO<sub>3-y</sub>(Sheet), Ru/H<sub>x</sub>MoO<sub>3-y</sub>(Sheet), Pd/H<sub>x</sub>MoO<sub>3-y</sub>(Sheet), and Au/H<sub>x</sub>MoO<sub>3-y</sub>(Sheet). (All of the catalysts were reduced by H<sub>2</sub> at 200 °C; Reaction conditions: catalyst (0.1 g), H<sub>2</sub>: CO<sub>2</sub> (0.5 atm:0.5 atm), light source:  $\lambda > 450$  nm, Reaction Temperature: 140 °C))

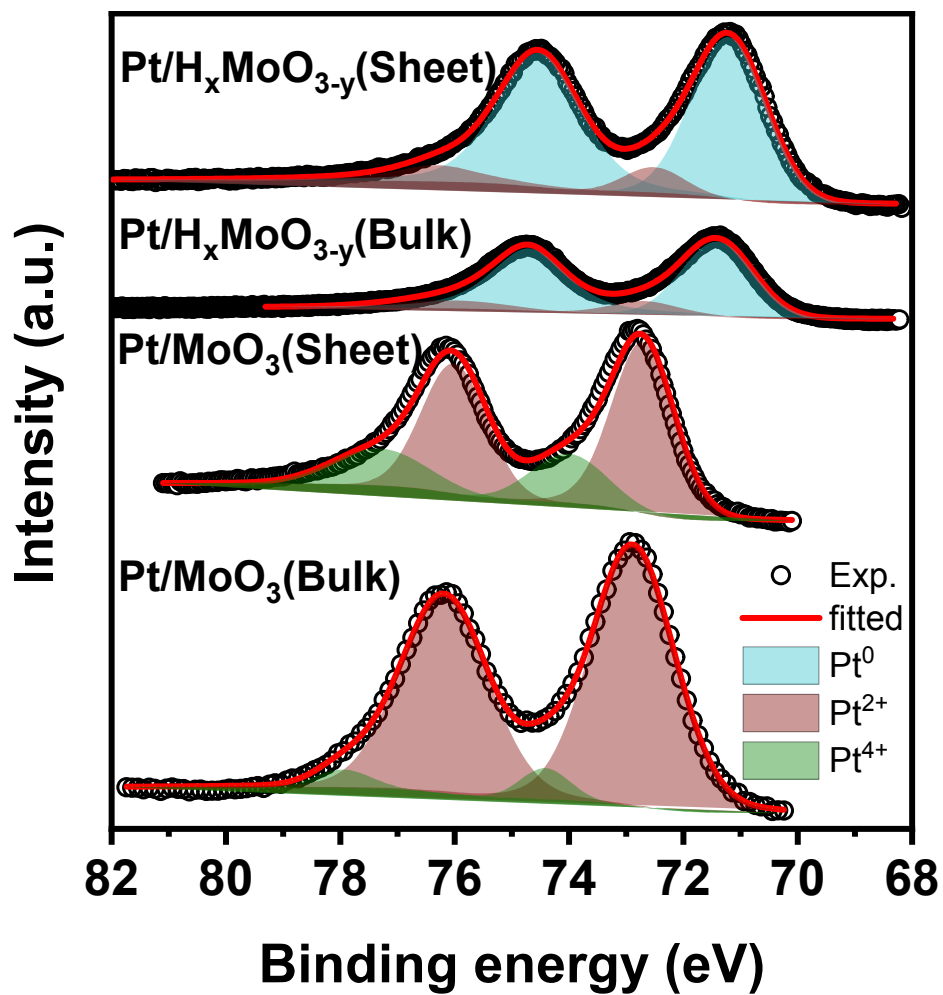

**Figure S10.** Pt 4f XPS spectra of Pt/H<sub>x</sub>MoO<sub>3-y</sub>(Sheet), Pt/H<sub>x</sub>MoO<sub>3-y</sub>(Bulk), Pt/MoO<sub>3</sub>(Sheet) and Pt/MoO<sub>3</sub>(Bulk).

**Table S2.** Summary of the results of XPS measurement for the Pt/MoO<sub>3</sub>(Bulk), Pt/MoO<sub>3</sub>(Sheet), Pt/H<sub>x</sub>MoO<sub>3-y</sub>(Bulk) and Pt/H<sub>x</sub>MoO<sub>3-y</sub>(Sheet).

| Sample                                       | Mo 3d XPS                 |                           |                           |                                                               | O 1s XPS                |                           |                           |                                                              |
|----------------------------------------------|---------------------------|---------------------------|---------------------------|---------------------------------------------------------------|-------------------------|---------------------------|---------------------------|--------------------------------------------------------------|
|                                              | Mo <sup>4+</sup><br>(at%) | Mo <sup>5+</sup><br>(at%) | Mo <sup>6+</sup><br>(at%) | (Mo <sup>4+</sup> +<br>Mo <sup>5+</sup> )/Mo <sub>total</sub> | O <sub>L</sub><br>(at%) | O <sub>-OH</sub><br>(at%) | O <sub>H2O</sub><br>(at%) | (O <sub>-OH</sub> +<br>O <sub>H2O</sub> )/O <sub>total</sub> |
| Pt/MoO <sub>3</sub> (Bulk)                   | 0                         | 11                        | 89                        | 11                                                            | 66.1                    | 33.9                      | 0                         | 33.9                                                         |
| Pt/MoO <sub>3</sub> (Sheet)                  | 0                         | 81                        | 19                        | 81                                                            | 58                      | 42                        | 0                         | 42                                                           |
| Pt/H <sub>x</sub> MoO <sub>3-y</sub> (Bulk)  | 4.9                       | 44.1                      | 51                        | 49                                                            | 48.5                    | 43.1                      | 9.4                       | 52.5                                                         |
| Pt/H <sub>x</sub> MoO <sub>3-y</sub> (Sheet) | 44.4                      | 41.5                      | 14.1                      | 85.9                                                          | 45                      | 48.5                      | 6.5                       | 55                                                           |

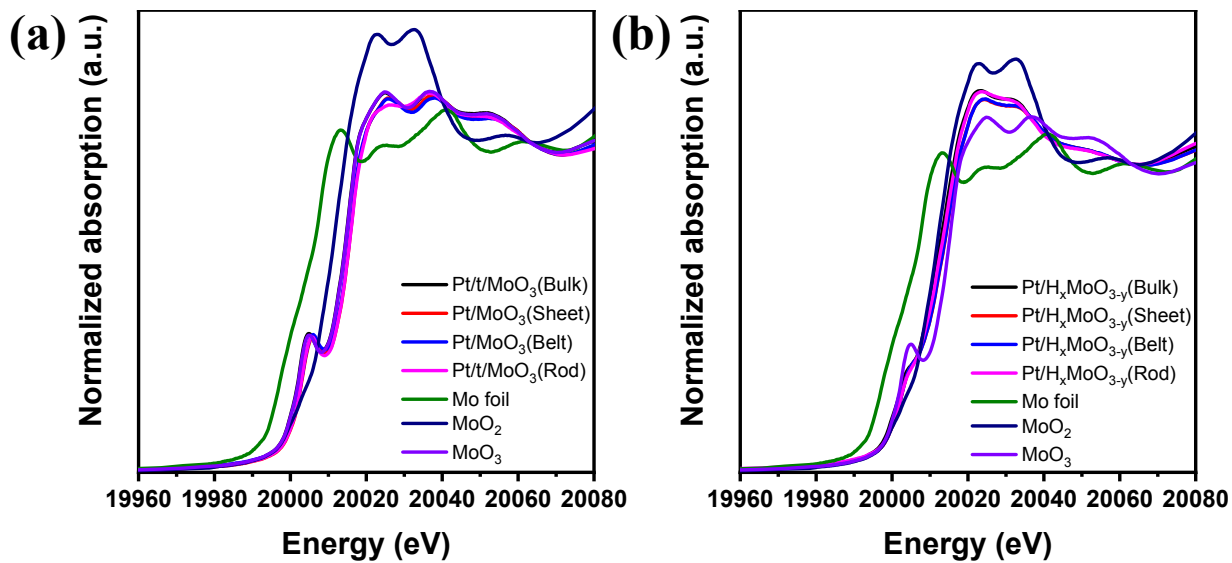

**Figure S11.** In-situ Mo K-edge X-ray absorption near-edge structure (XANES) spectra of (a) Pt/MoO<sub>3</sub> with different morphologies before reduction and (b) after reduction.



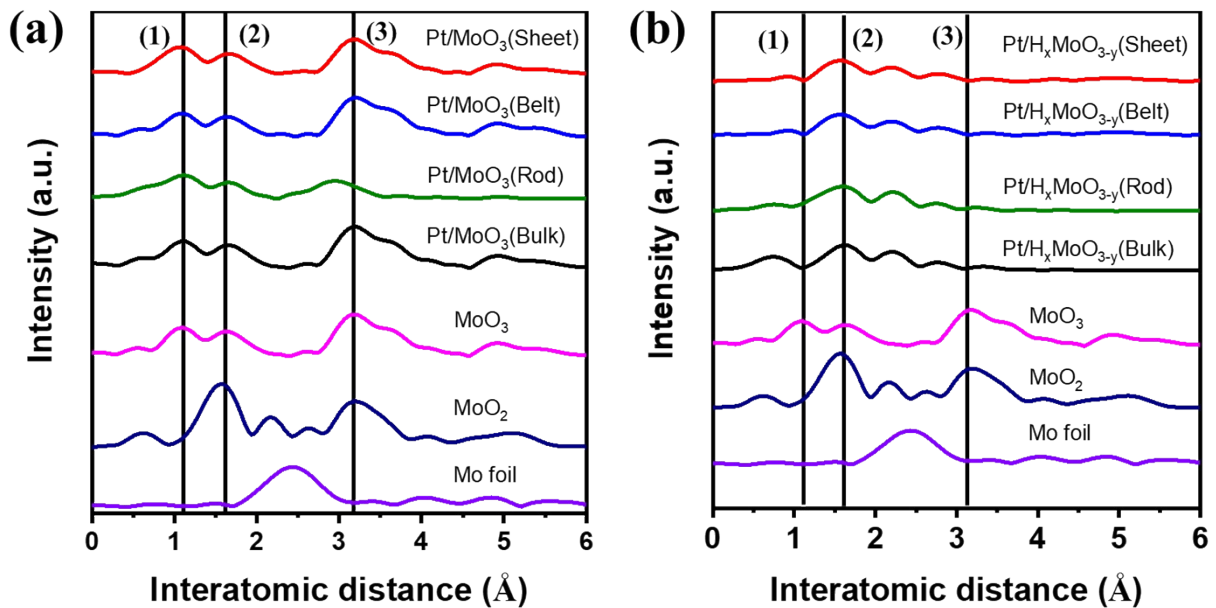

**Figure S12.** Radial distribution functions (RDFs) of (a) Pt/MoO<sub>3</sub> with different morphologies before reduction and (b) after reduction.

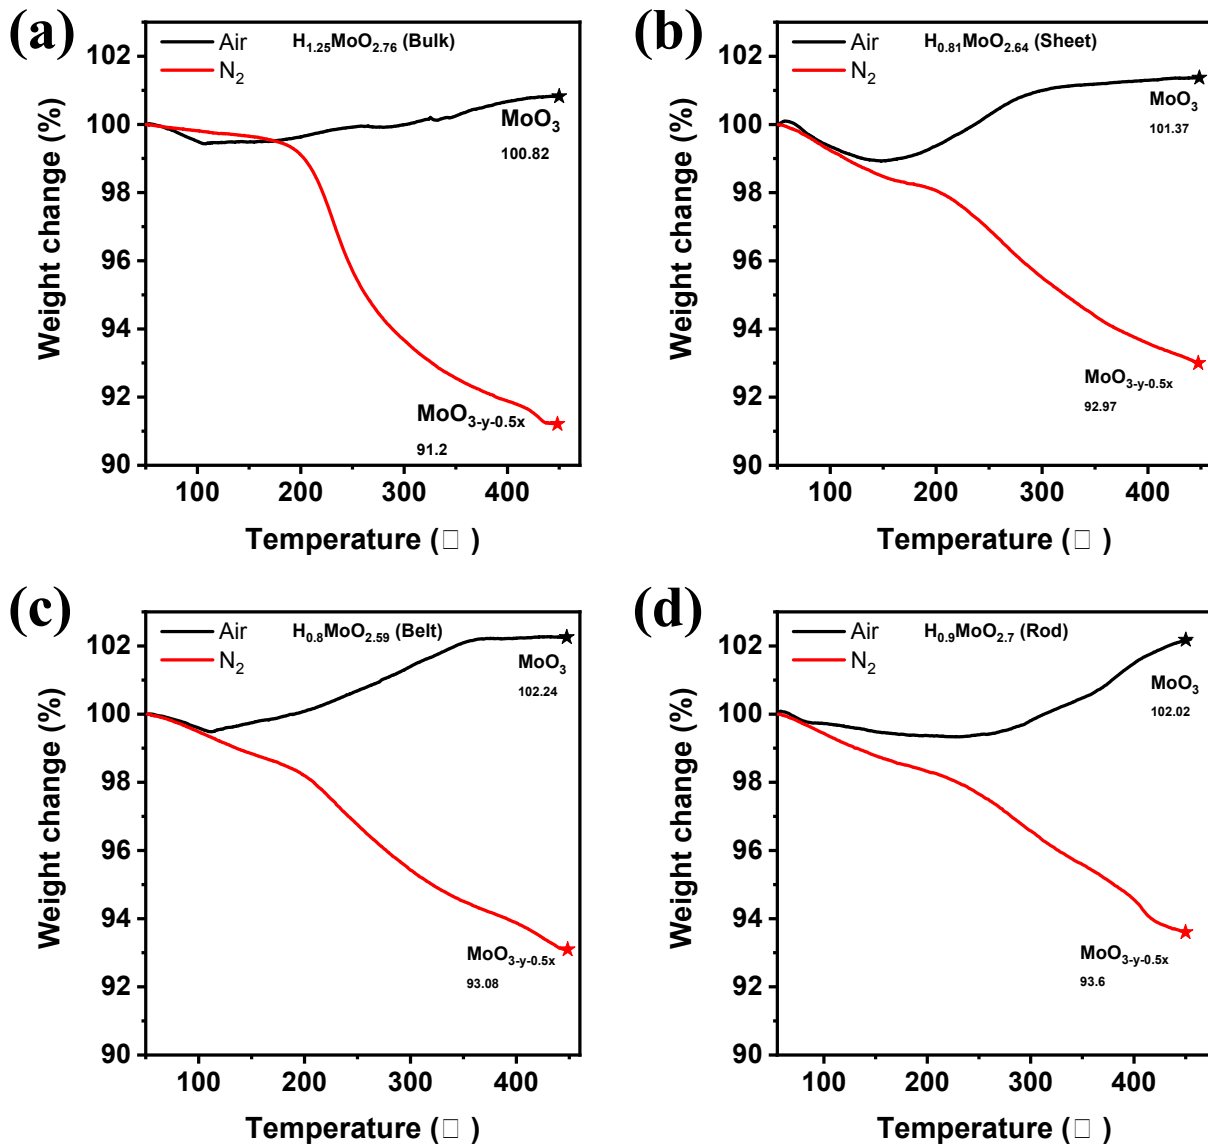

**Figure S13.** Weight changes of the Pt/H<sub>x</sub>MoO<sub>3-y</sub> with different morphologies (a) Bulk, (b) Sheet, (c) Belt and (d) Rod in a flow of either air or N<sub>2</sub> measured by TG analysis.

In order to quantify the amounts of intercalated H<sup>+</sup> and oxygen vacancies formed in the MoO<sub>3</sub> upon H<sub>2</sub> reduction, thermogravimetric (TG) analysis was carried out in either N<sub>2</sub> or air gas environment. For the Pt/H<sub>x</sub>MoO<sub>3-y</sub> (Bulk, Sheet, Belt, Rod) measured in a N<sub>2</sub> environment, initial weight losses of ~1.0wt% are seen at temperatures below ~100 and 200 °C, respectively, which are due to the evaporation of surface adsorbed water molecules. Subsequently, they show further

weight losses from 200 °C to 450 °C, which are associated with the thermal dehydration of –OH groups to form MoO<sub>3-x</sub> suboxides ( $\text{Pt/H}_x\text{MoO}_{3-y} \rightarrow \text{MoO}_{3-y-x/2} + 1/2x \text{H}_2\text{O}$ ). By comparing the losing weight differences of each sample at 450 °C, the stoichiometry of intercalated H<sup>+</sup> (x) is calculated to be 1.25, 0.81, 0.8 and 0.9 for Pt/H<sub>x</sub>MoO<sub>3-y</sub>(Bulk), Pt/H<sub>x</sub>MoO<sub>3-y</sub>(Sheet) and Pt/H<sub>x</sub>MoO<sub>3-y</sub>(Belt) and Pt/H<sub>x</sub>MoO<sub>3-y</sub>(Rod), respectively. In comparison, different TG profiles are observed in a flow of air due to the weight gain associated with the filling of oxygen vacancies with molecular O<sub>2</sub> to form MoO<sub>3</sub>, in addition to the release of intercalated H<sup>+</sup> as water ( $\text{Pt/H}_x\text{MoO}_{3-y} + \text{O}_2 \rightarrow \text{MoO}_3 + 1/2x \text{H}_2\text{O}$ ). For the Pt/H<sub>x</sub>MoO<sub>3-y</sub> (Bulk, Sheet, Belt, Rod) measured in an air environment, a considerable weight gain is seen at temperatures from 200 to 450 °C due to the presence of substantial amount of oxygen vacancy in the sample. By comparing the weight gain differences of each sample at 450 °C, the stoichiometry of oxygen vacancy (y) is calculated to be 0.24, 0.34, 0.4 and 0.29 for Pt/H<sub>x</sub>MoO<sub>3-y</sub>(Bulk), Pt/H<sub>x</sub>MoO<sub>3-y</sub>(Sheet), Pt/H<sub>x</sub>MoO<sub>3-y</sub>(Belt) and Pt/H<sub>x</sub>MoO<sub>3-y</sub>(Rod), respectively.

**Table S3.** The concentration of intercalated H<sup>+</sup> and oxygen vacancy in the samples.

| Sample                                       | Concentration of intercalated H <sup>+</sup> (x) | concentration of oxygen vacancies (y) |
|----------------------------------------------|--------------------------------------------------|---------------------------------------|
| Pt/H <sub>x</sub> MoO <sub>3-y</sub> (Bulk)  | 1.25                                             | 0.24                                  |
| Pt/H <sub>x</sub> MoO <sub>3-y</sub> (Sheet) | 0.81                                             | 0.34                                  |
| Pt/H <sub>x</sub> MoO <sub>3-y</sub> (Belt)  | 0.8                                              | 0.4                                   |
| Pt/H <sub>x</sub> MoO <sub>3-y</sub> (Rod)   | 0.9                                              | 0.29                                  |

**Table S4.** The amount of oxygen vacancy on the surface in Pt/H<sub>x</sub>MoO<sub>3-y</sub> (Bulk, Belt, Rod, Sheet) after H<sub>2</sub> reduction.

| Sample                                       | The amount of surface oxygen vacancy (μmol·g-cat <sup>-1</sup> ) |
|----------------------------------------------|------------------------------------------------------------------|
| Pt/H <sub>x</sub> MoO <sub>3-y</sub> (Bulk)  | 446                                                              |
| Pt/H <sub>x</sub> MoO <sub>3-y</sub> (Sheet) | 664                                                              |
| Pt/H <sub>x</sub> MoO <sub>3-y</sub> (Belt)  | 332                                                              |
| Pt/H <sub>x</sub> MoO <sub>3-y</sub> (Rod)   | 270                                                              |

#### Determination of surface oxygen vacancy

The oxygen vacancy on the surface of the catalyst can capture the oxygen of the diphenyl sulfoxide to produce diphenyl sulfide. The oxygen vacancy in MoO<sub>3</sub> cannot be regenerated in dark without H<sub>2</sub> gas. The reaction will stop when the surface oxygen vacancy of MoO<sub>3</sub> is exhausted. Therefore, this reaction can be used to calculate the number of surface oxygen vacancies with different morphologies of MoO<sub>3</sub> by counting the yield of diphenyl sulfide. The reaction operation as follows: First, add 50 mg catalyst to the quartz tube and seal the nozzle for H<sub>2</sub> reduction with the temperature of 200 °C, and the hydrogen reduction process was maintained for 30 minutes. After that, argon gas is introduced into the quartz tube for 20 minutes to expel the hydrogen. And add the reaction solution into the quartz tube (Diphenyl sulfoxide:0.2mmol; Diphenyl: 0.1mmol; Methylbenzene: 10mL). Finally, 0.1mL of the reaction solution is taken out and analyzed by GC.

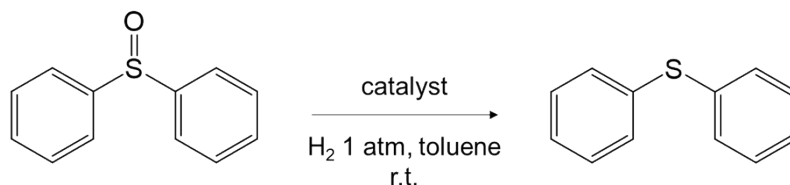

**Scheme S1.** Deoxygenation of diphenyl sulfoxide to phenyl sulfide using molecular H<sub>2</sub> as a reductant.

**Table S5.** Summary of the results of XPS measurement for the Pt/H<sub>x</sub>MoO<sub>3-y</sub>(Sheet), Pt/H<sub>x</sub>MoO<sub>3-y</sub>(Sheet)→CO<sub>2</sub> and Pt/H<sub>x</sub>MoO<sub>3-y</sub>(Sheet)→CO<sub>2</sub>→H<sub>2</sub>.

| Sample                                                                          | Mo 3d XPS                 |                           |                           |                                                               | O 1s XPS                |                           |                           |                                                              |
|---------------------------------------------------------------------------------|---------------------------|---------------------------|---------------------------|---------------------------------------------------------------|-------------------------|---------------------------|---------------------------|--------------------------------------------------------------|
|                                                                                 | Mo <sup>4+</sup><br>(at%) | Mo <sup>5+</sup><br>(at%) | Mo <sup>6+</sup><br>(at%) | (Mo <sup>4+</sup> +<br>Mo <sup>5+</sup> )/Mo <sub>total</sub> | O <sub>L</sub><br>(at%) | O <sub>-OH</sub><br>(at%) | O <sub>H2O</sub><br>(at%) | (O <sub>-OH</sub> +<br>O <sub>H2O</sub> )/O <sub>total</sub> |
| Pt/H <sub>x</sub> MoO <sub>3-y</sub><br>(sheet)                                 | 44.4                      | 41.5                      | 14.1                      | 85.9                                                          | 45                      | 48.5                      | 6.5                       | 55                                                           |
| Pt/H <sub>x</sub> MoO <sub>3-y</sub><br>(sheet)→CO <sub>2</sub>                 | 22.3                      | 24.3                      | 53.4                      | 46.6                                                          | 58.5                    | 33.7                      | 7.8                       | 41.5                                                         |
| Pt/H <sub>x</sub> MoO <sub>3-y</sub><br>(Sheet)→CO <sub>2</sub> →H <sub>2</sub> | 63.3                      | 23.7                      | 13                        | 87                                                            | 43.6                    | 48.2                      | 8.2                       | 56.4                                                         |

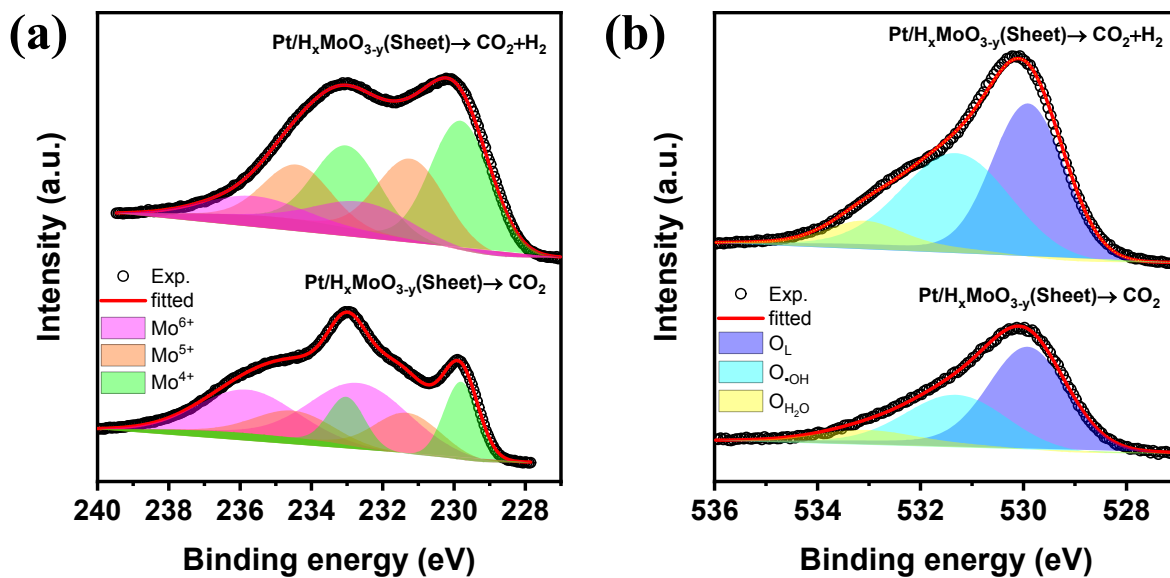

**Figure S14.** XPS spectra of  $\text{Pt}/\text{H}_x\text{MoO}_{3-y}(\text{Sheet}) \rightarrow \text{CO}_2 + \text{H}_2$  and  $\text{Pt}/\text{H}_x\text{MoO}_{3-y}(\text{Sheet}) \rightarrow \text{CO}_2$ : (a) Mo 3d XPS spectra, (b) O 1s XPS spectra.

**Table S6.** Summary of the results of XPS measurement for the  $\text{Pt}/\text{H}_x\text{MoO}_{3-y}(\text{Sheet})$ ,  $\text{Pt}/\text{H}_x\text{MoO}_{3-y}(\text{Sheet}) \rightarrow \text{CO}_2$  and  $\text{Pt}/\text{H}_x\text{MoO}_{3-y}(\text{Sheet}) \rightarrow \text{CO}_2 + \text{H}_2$

| Sample                                                                             | Mo 3d XPS                 |                           |                           |                                                               | O 1s XPS                |               |                           |                                                  |
|------------------------------------------------------------------------------------|---------------------------|---------------------------|---------------------------|---------------------------------------------------------------|-------------------------|---------------|---------------------------|--------------------------------------------------|
|                                                                                    | Mo <sup>4+</sup><br>(at%) | Mo <sup>5+</sup><br>(at%) | Mo <sup>6+</sup><br>(at%) | (Mo <sup>4+</sup> +<br>Mo <sup>5+</sup> )/Mo <sub>total</sub> | O <sub>L</sub><br>(at%) | O-OH<br>(at%) | O <sub>H2O</sub><br>(at%) | (O-OH +<br>O <sub>H2O</sub> )/O <sub>total</sub> |
| Pt/H <sub>x</sub> MoO <sub>3-y</sub><br>(sheet)                                    | 44.4                      | 41.5                      | 14.1                      | 85.9                                                          | 45                      | 48.5          | 6.5                       | 55                                               |
| Pt/H <sub>x</sub> MoO <sub>3-y</sub><br>(sheet) → CO <sub>2</sub>                  | 22.3                      | 24.3                      | 53.4                      | 46.6                                                          | 58.5                    | 33.7          | 7.8                       | 41.5                                             |
| Pt/H <sub>x</sub> MoO <sub>3-y</sub><br>(Sheet) → CO <sub>2</sub> + H <sub>2</sub> | 50.3                      | 32.9                      | 16.8                      | 83.2                                                          | 47.6                    | 44            | 8.4                       | 52.4                                             |

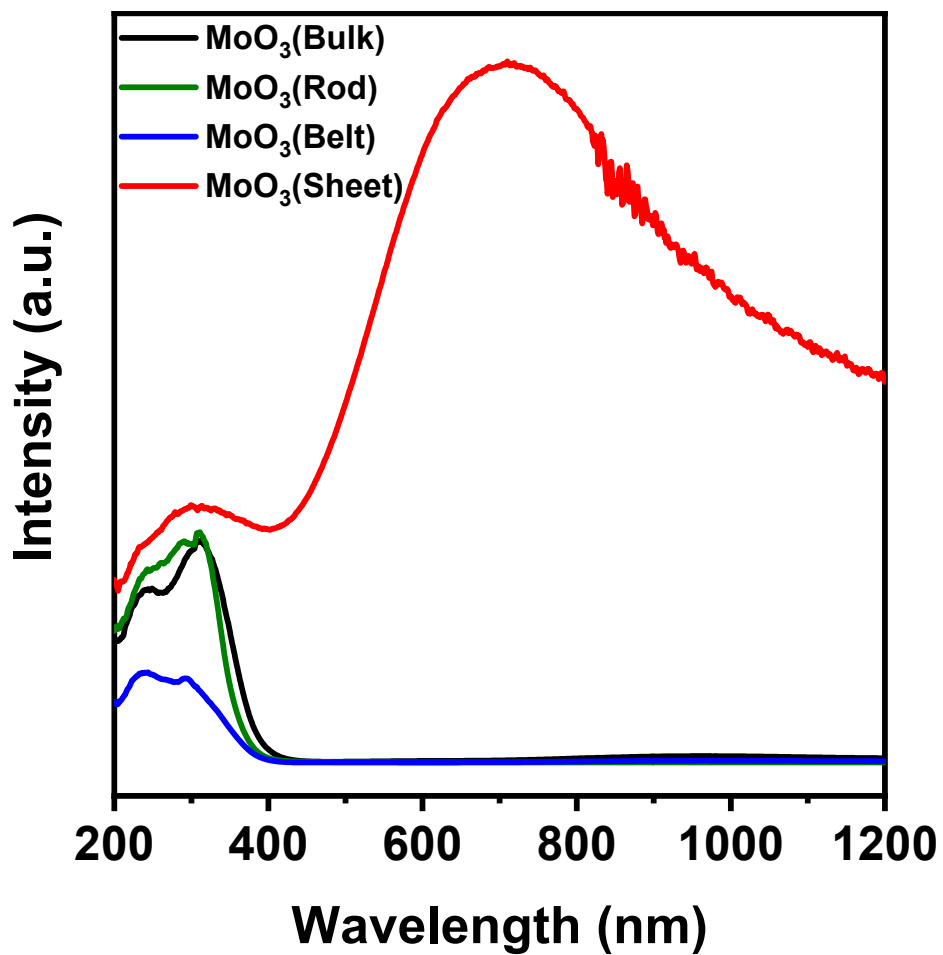

**Figure S15.** Diffuse reflectance UV-vis-NIR spectra of MoO<sub>3</sub> with different morphologies.

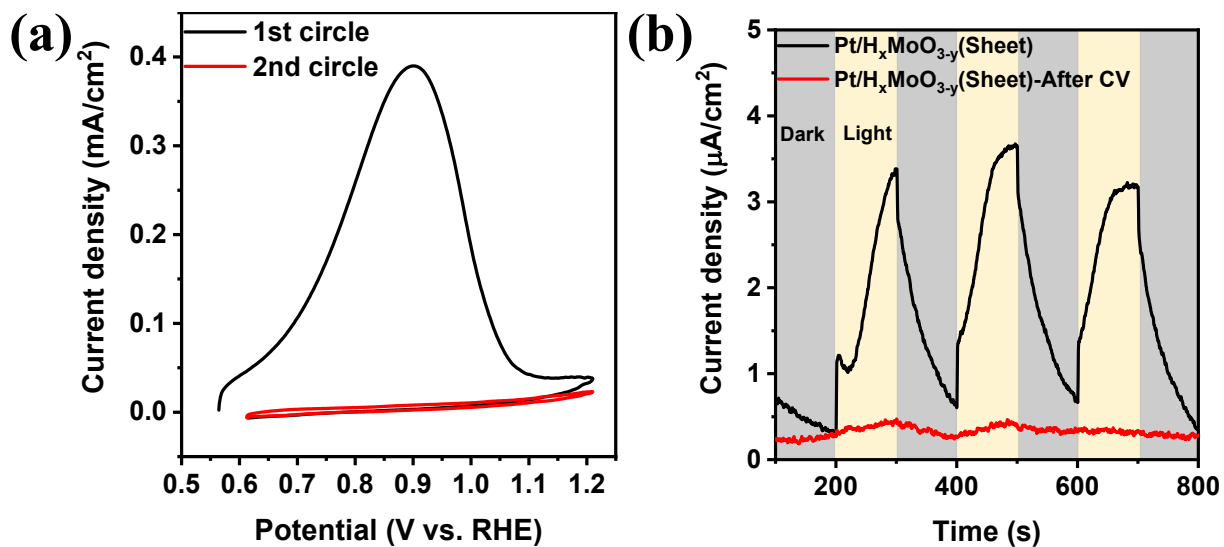

**Figure S16.** (a) CV test of Pt/H<sub>x</sub>MoO<sub>3-y</sub>(Sheet) with two circles and (b) Photocurrent density of Pt/H<sub>x</sub>MoO<sub>3-y</sub>(Sheet) and Pt/H<sub>x</sub>MoO<sub>3-y</sub>(Sheet)-After CV.



## References

- 1 Y. F. Li, N. Soheilnia, M. Greiner, U. Ulmer, T. Wood, A. A. Jelle, Y. Dong, A. P. Yin Wong, J. Jia and G. A. Ozin, *ACS Appl. Mater. Interfaces*, 2019, 11, 5610–5615.
- 2 X. G. Meng, T. Wang, L. Q. Liu, S. X. Ouyang, P. Li, H. L. Hu, T. Kako, H. Iwai, A. Tanaka, J. H. Ye, *Angew. Chem. Int. Ed.* 2014, 53, 11478.
- 3 L. He, T. E. Wood, B. Wu, Y. C. Dong, L. B. Hoch, L. M. Reyes, D. Wang, C. Kubel, C. X. Qian, J. Jia, K. Liao, P. G. O'Brien, A. Sandhel, J. Y. Y. Loh, P. Szymanski, N. P. Kherani, T. C. Sum, C. A. Mims, G. A. Ozin, *ACS Nano*. 2016, 10, 5578.
- 4 J. Jia, P. G. O'Brien, L. He, Q. Qiao, T. Fei, L. M. Reyes, T. E. Burrow, Y. C. Dong, K. Liao, M. Varela, S. J. Pennycook, M. Hmadeh, A. S. Helmy, N. P. Kherani, D. D. Perovic, G. A. Ozin, *Adv. Sci.* 2016, 3, 1600189.
- 5 H. B. Zhang, T. Wang, J. J. Wang, H. M. Liu, T. D. Dao, M. Li, G. G. Liu, X. G. Meng, K. Chang, L. Shi, T. Nagao, J. H. Ye, *Adv. Mater.* 2016, 28, 3703.
- 6 Y. Qi, L. Song, S. Ouyang, X. Liang, S. Ning, Q. Zhang, J. Ye, *Adv. Mater.* 2019, 32, 1903951.
- 7 Y. Qi, J. Jiang, X. Liang, S. Ouyang, W. Mi, S. Ning, L. Zhao, and J. Ye, *Adv. Funct. Mater.* 2021, 2100908.
- 8 M. Li, P. Li, K. Chang, T. Wang, L. Q. Liu, Q. Kang, S. X. Ouyang, J. H. Ye, *Chem. Commun.* 2015, 51, 7645.
- 9 J. Ren, S. X. Ouyang, H. Xu, X. G. Meng, T. Wang, D. F. Wang, J. H. Ye, *Adv. Energy Mater.* 2017, 7, 1601657.
